# Supplementary material for: Comprehensive evaluation of complex polymicrobial specimens using next generation sequencing and standard microbiological culture
Source: PubMed Central journal article supplement (PMC7096443; doi:10.1038/s41598-020-62424-x), 2020-03-25

# BAL02

Relative Abundance by Classification Group

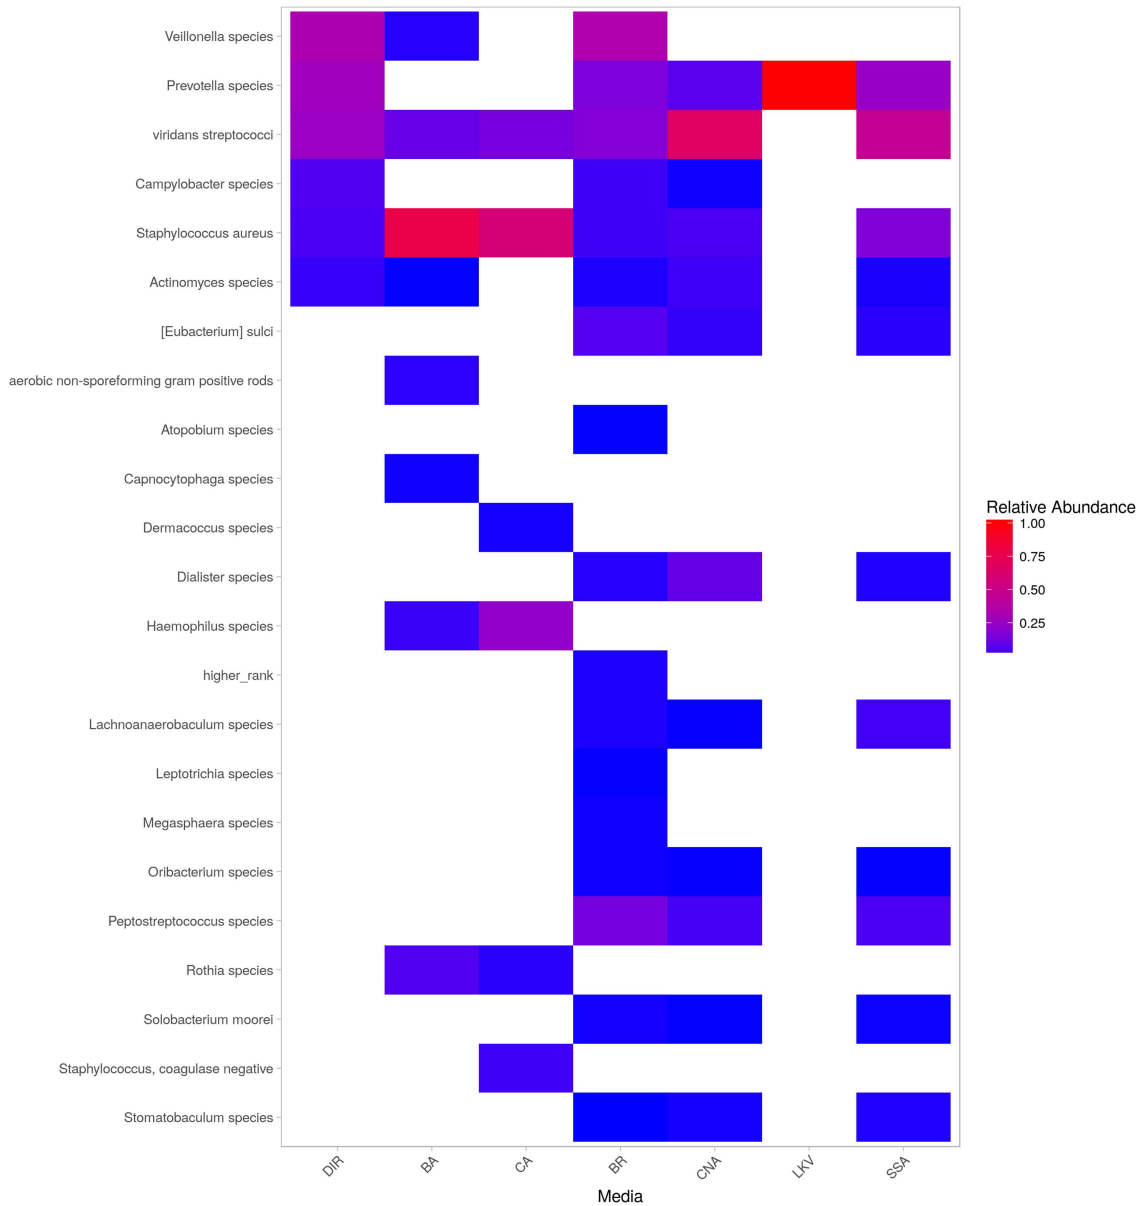

# BAL03

Relative Abundance by Classification Group

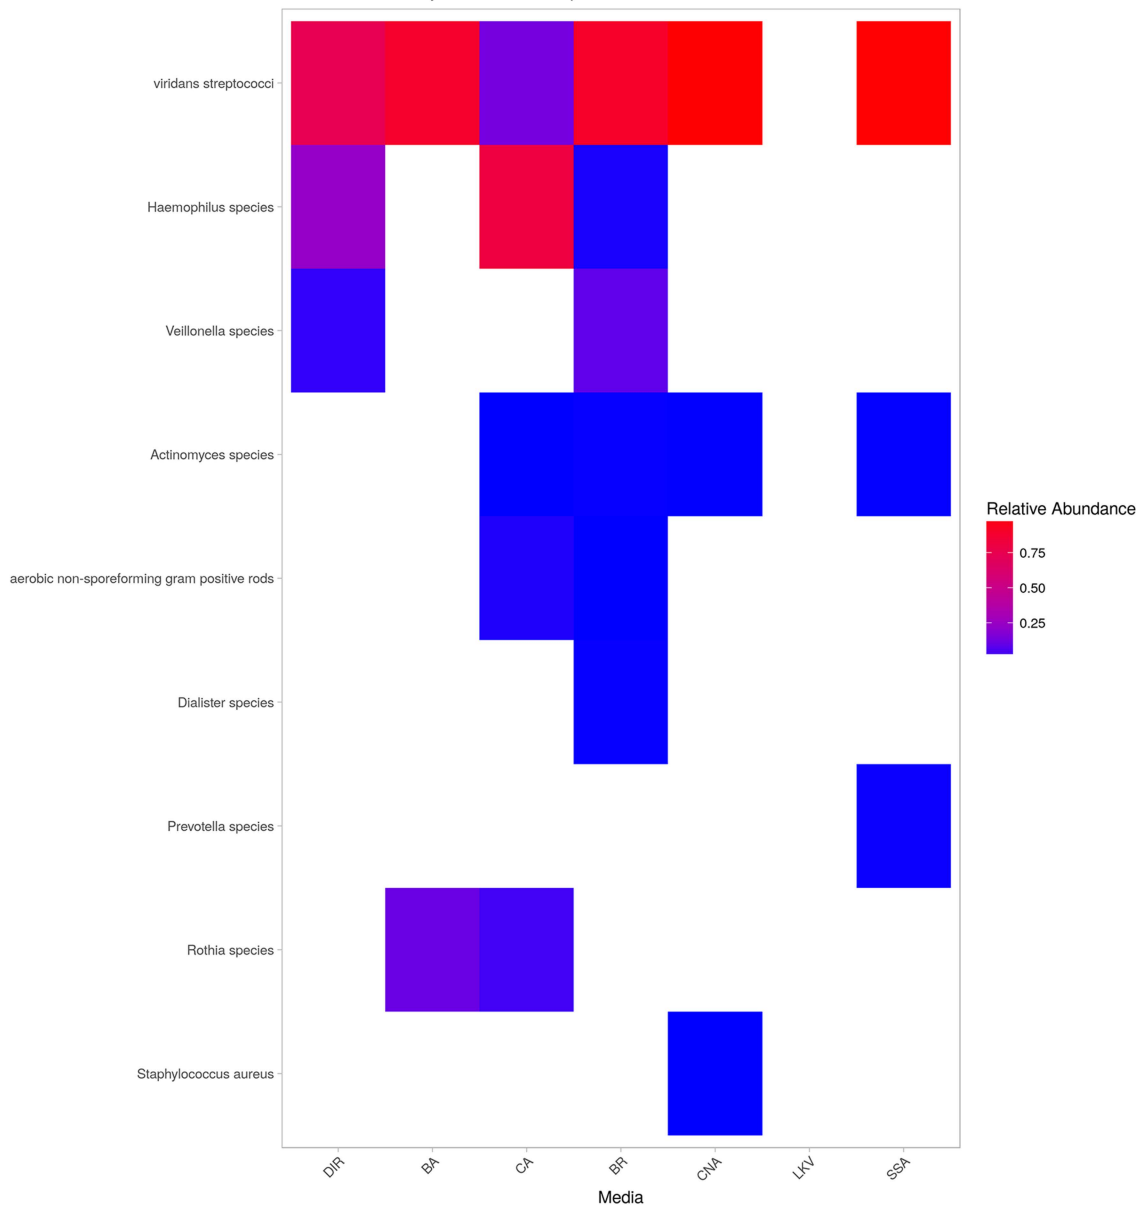

# BAL04

Relative Abundance by Classification Group

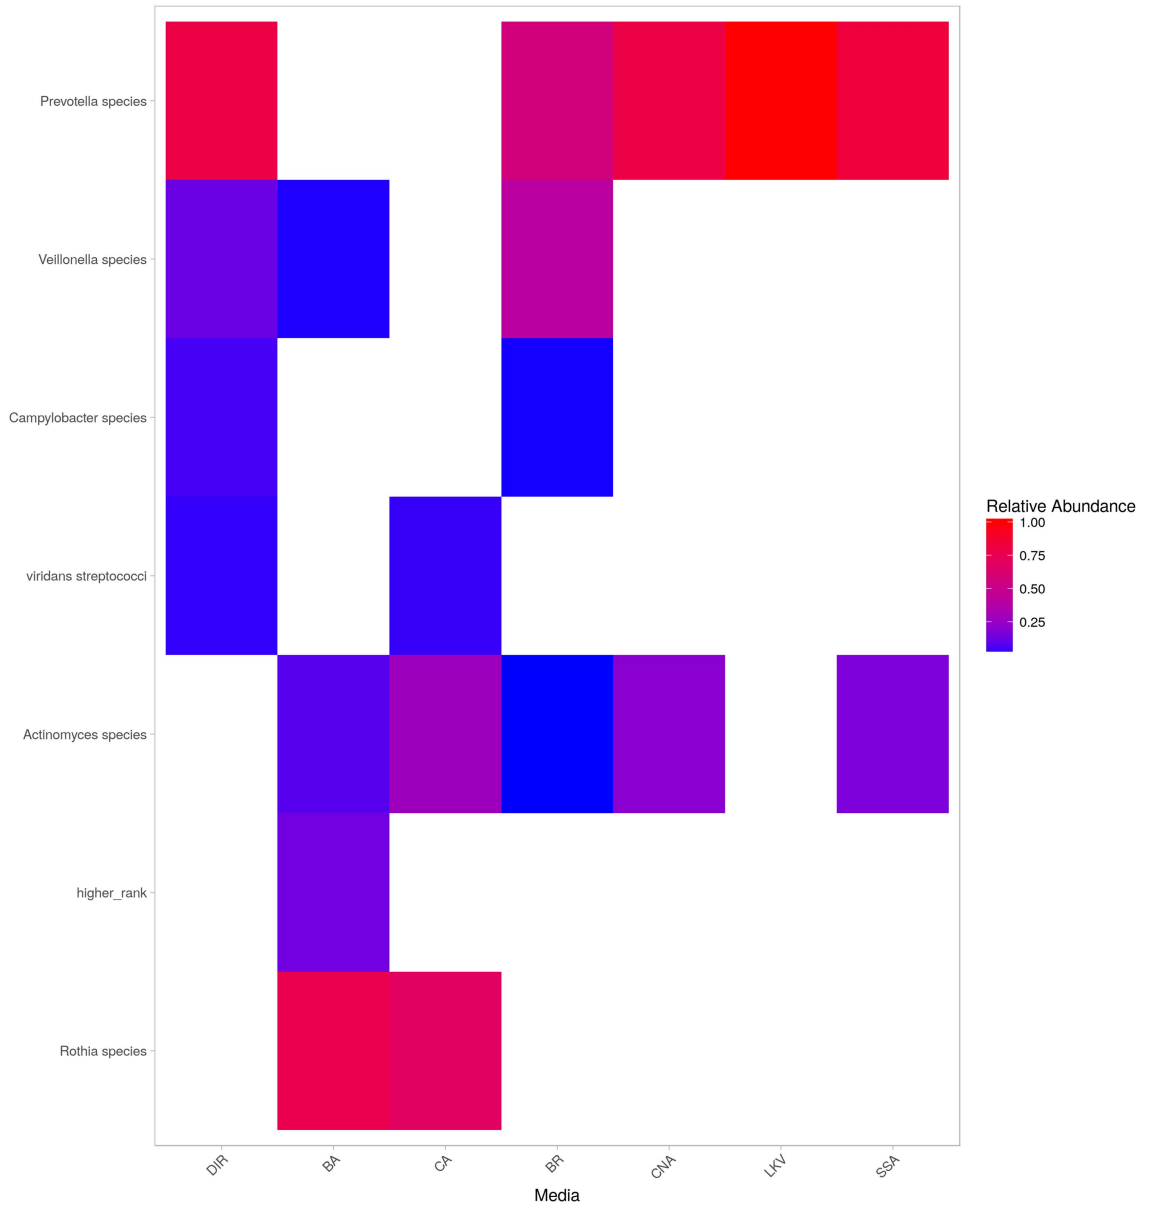

# BAL05

Relative Abundance by Classification Group

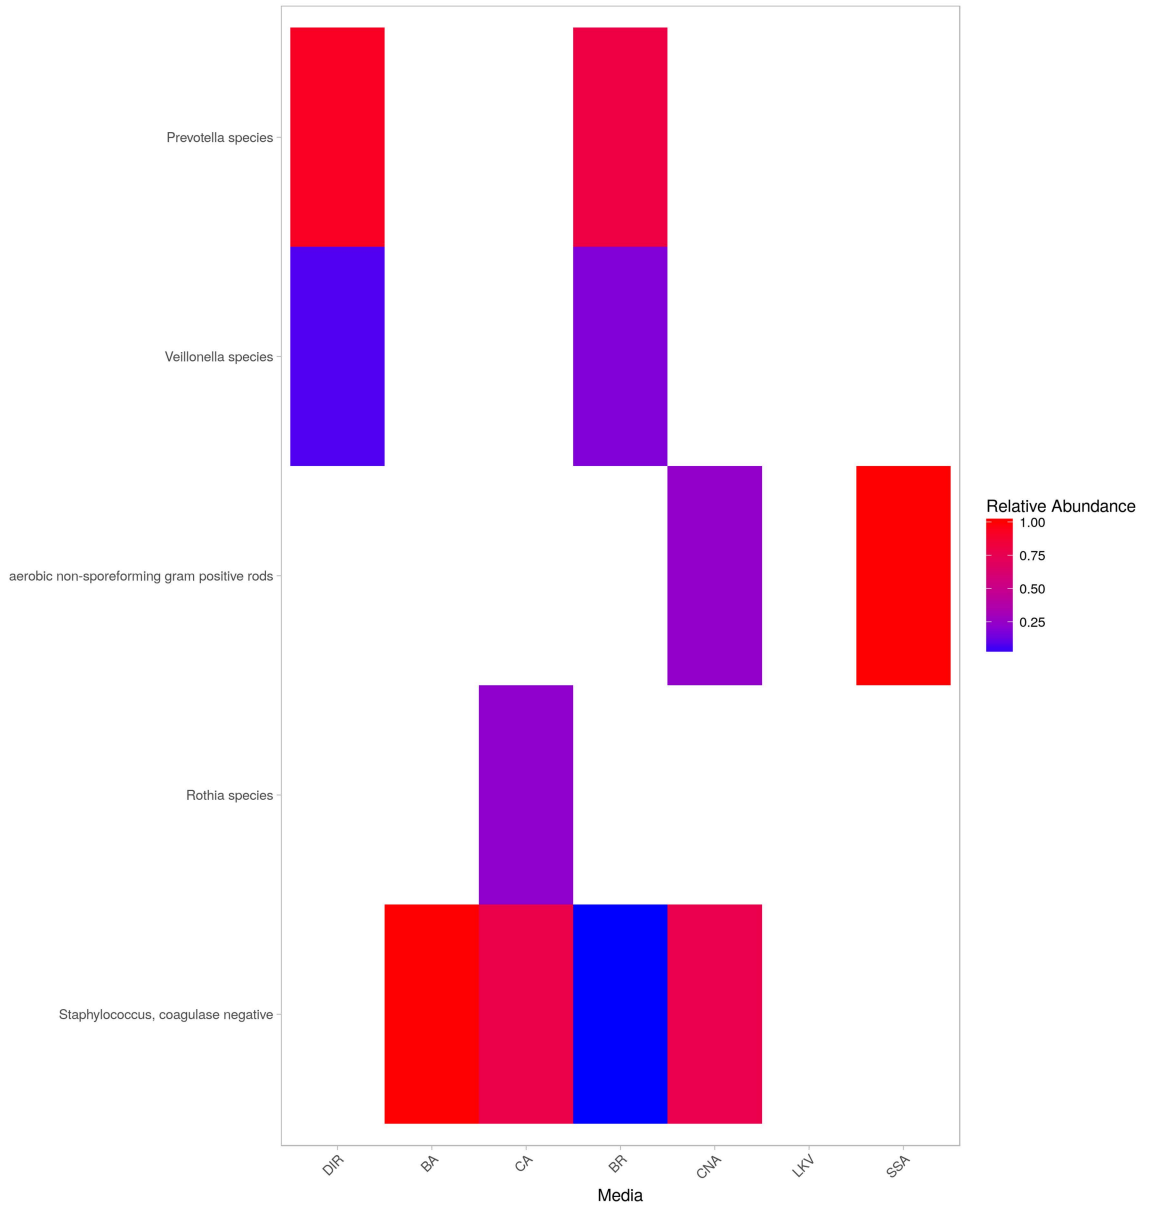

# BAL06

Relative Abundance by Classification Group

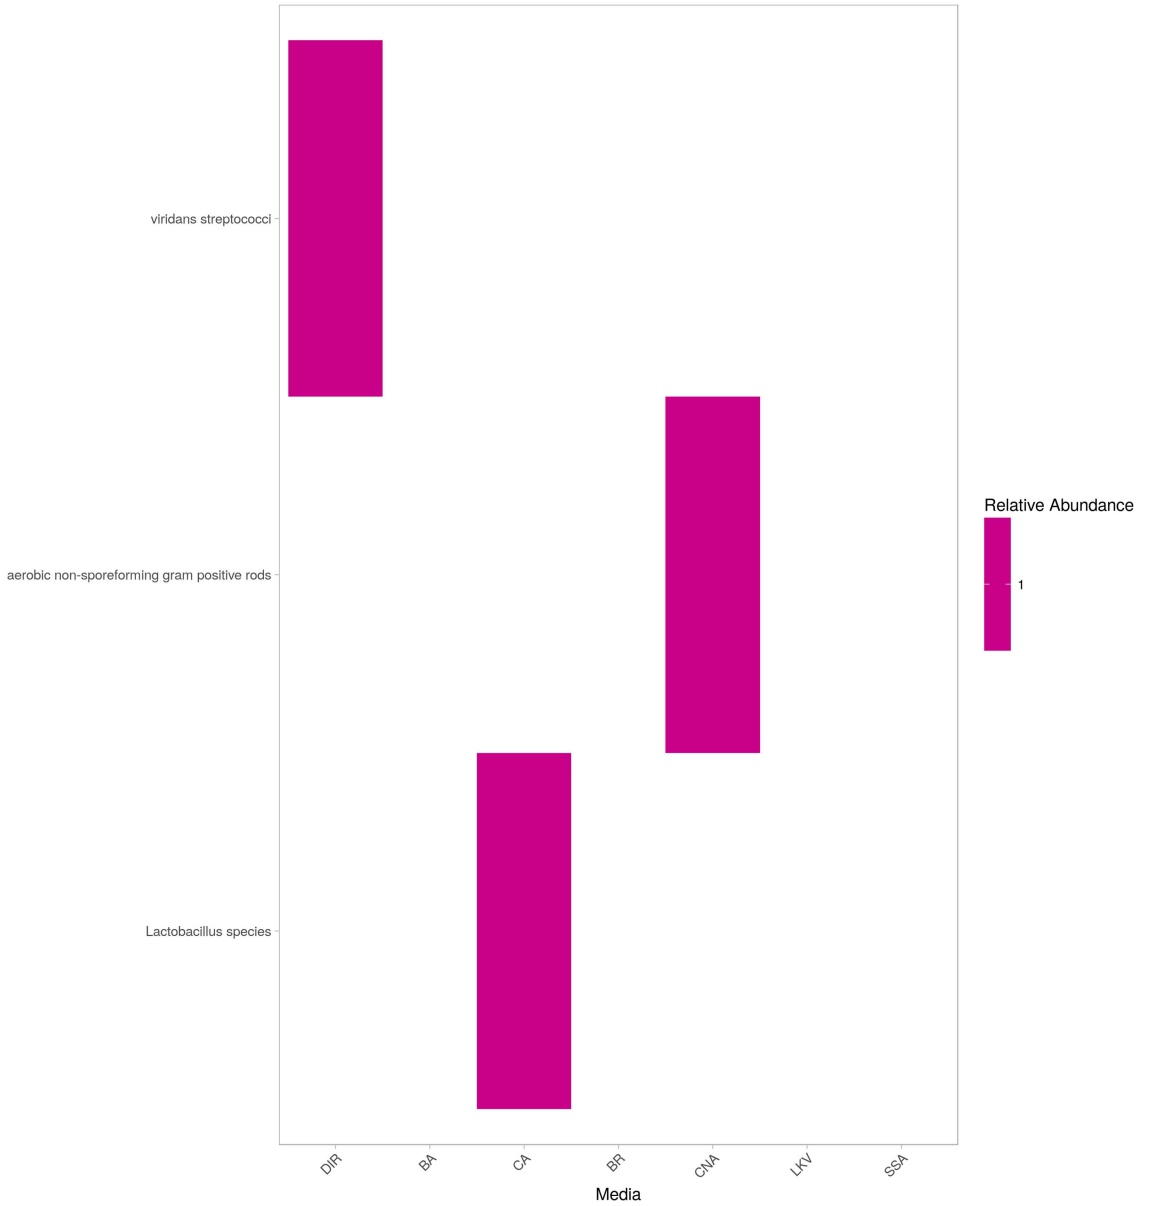

# BAL07

Relative Abundance by Classification Group

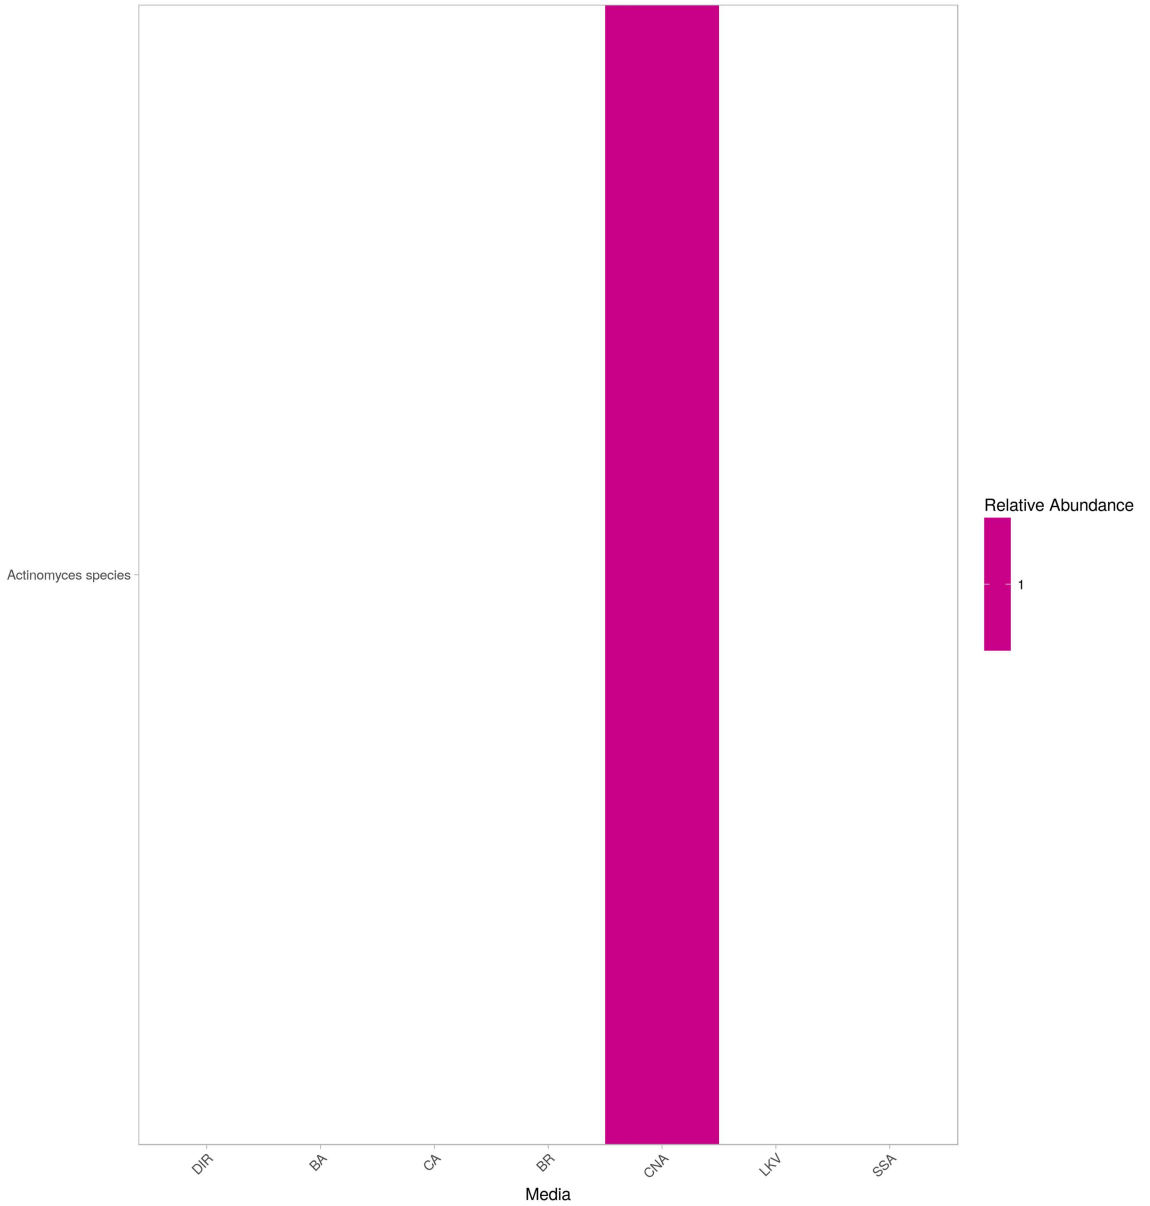

# BAL08

Relative Abundance by Classification Group

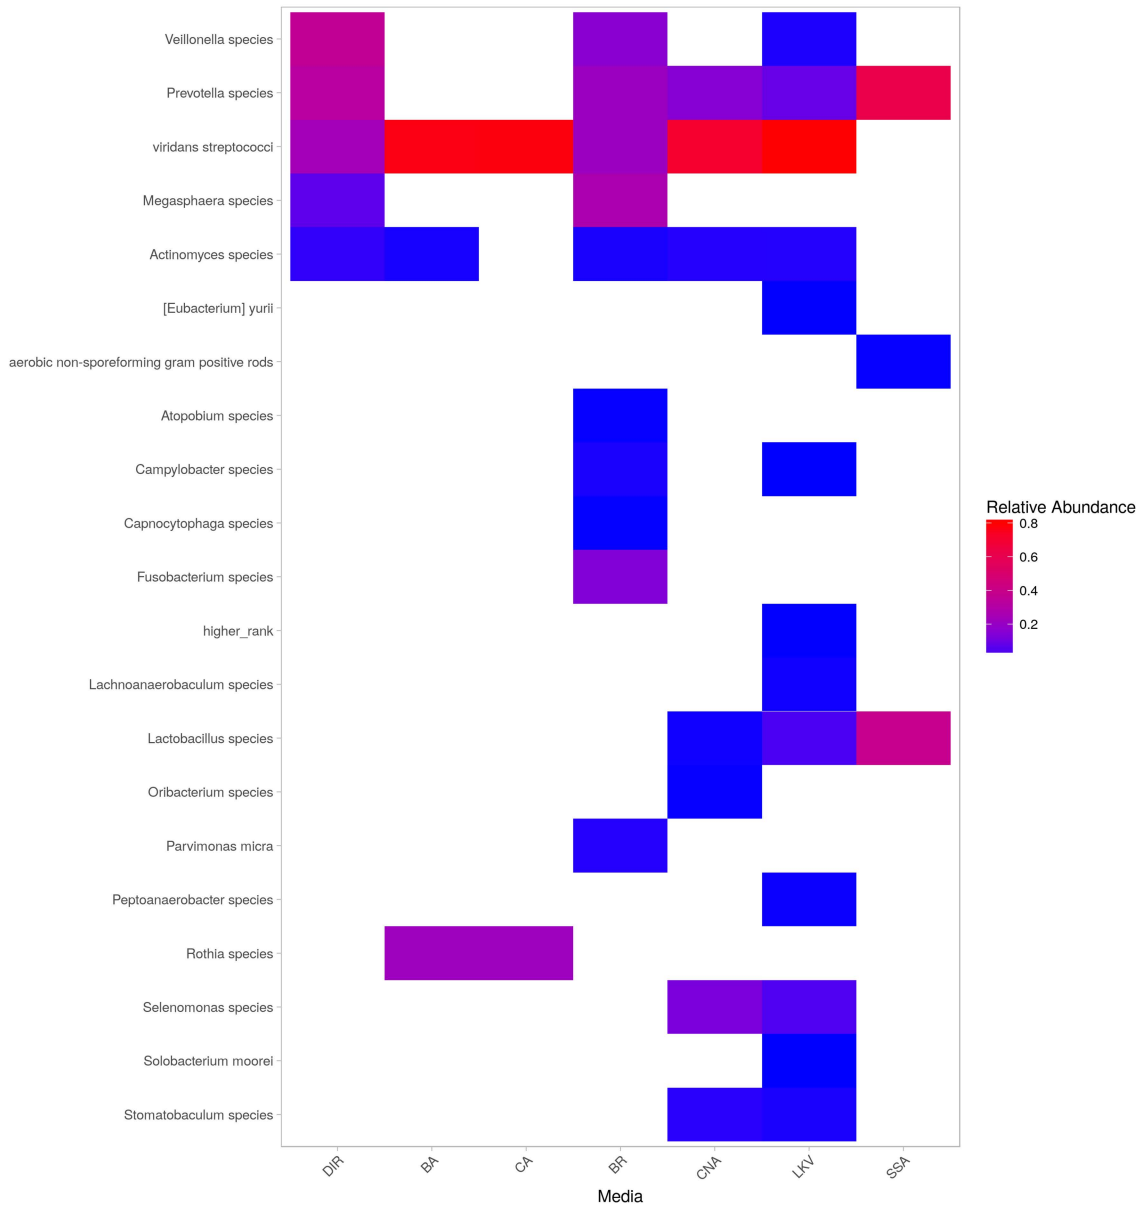



# BAL09

Relative Abundance by Classification Group

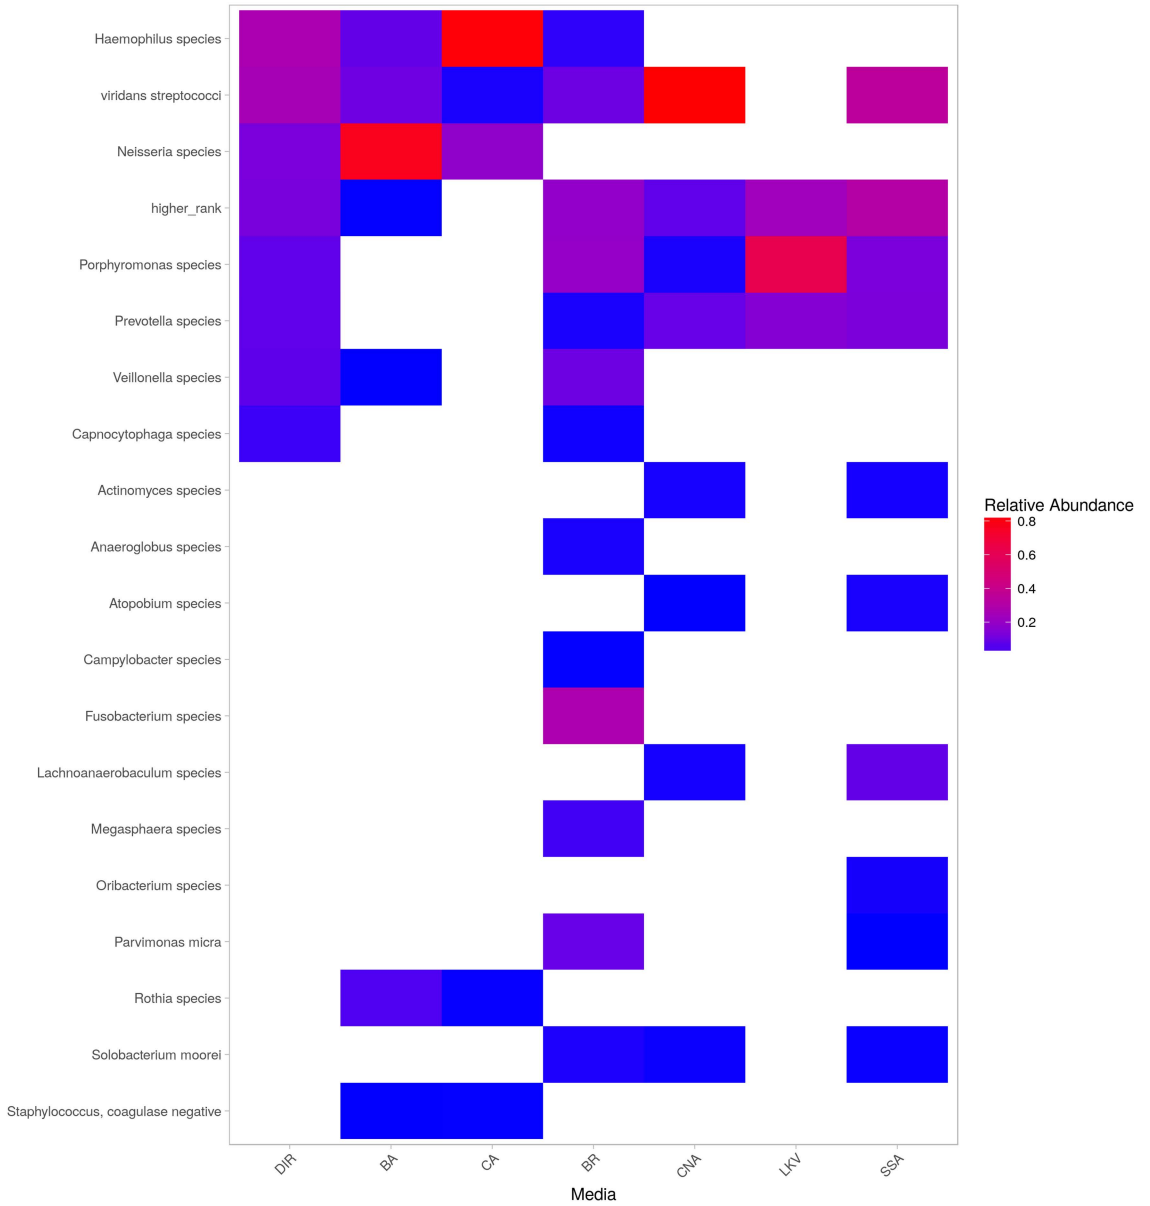

# BAL10

Relative Abundance by Classification Group

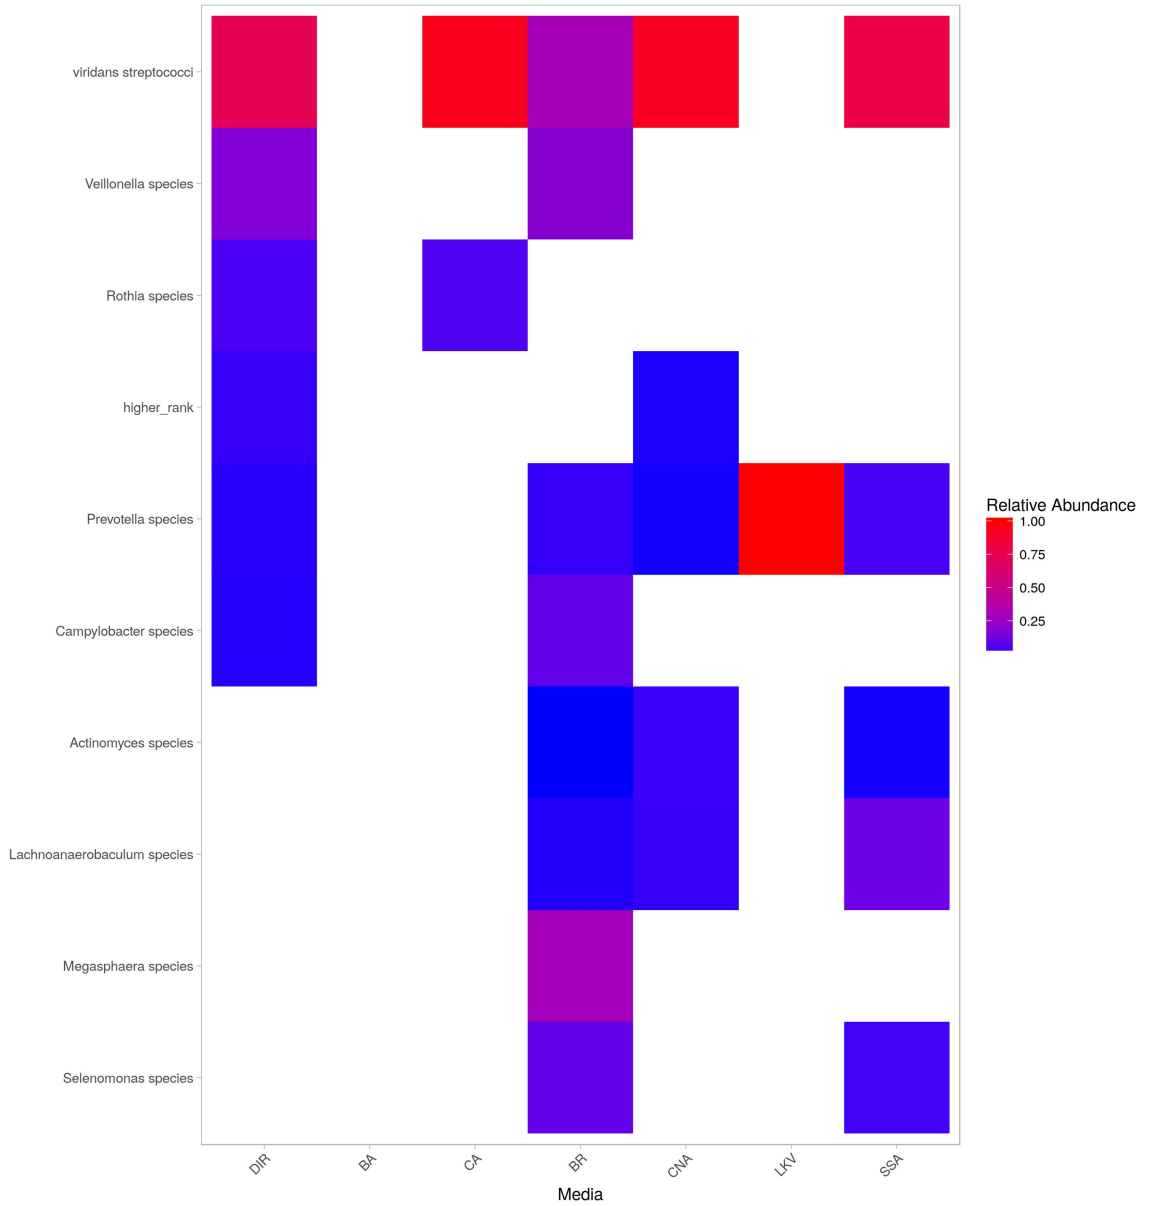

# BAL11

Relative Abundance by Classification Group

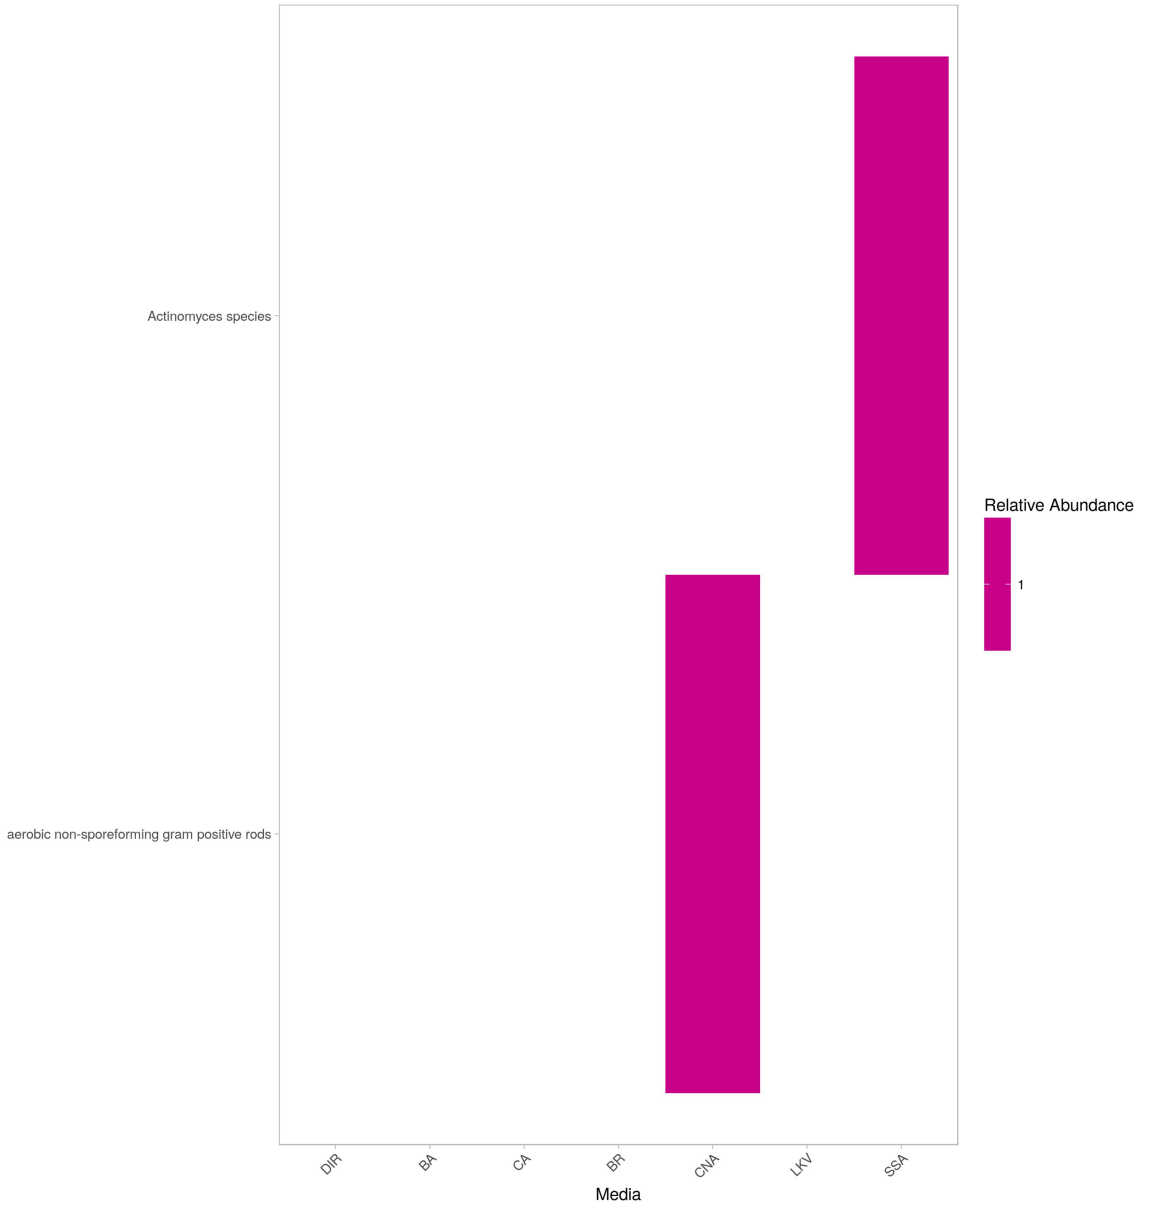

# BAL12

Relative Abundance by Classification Group

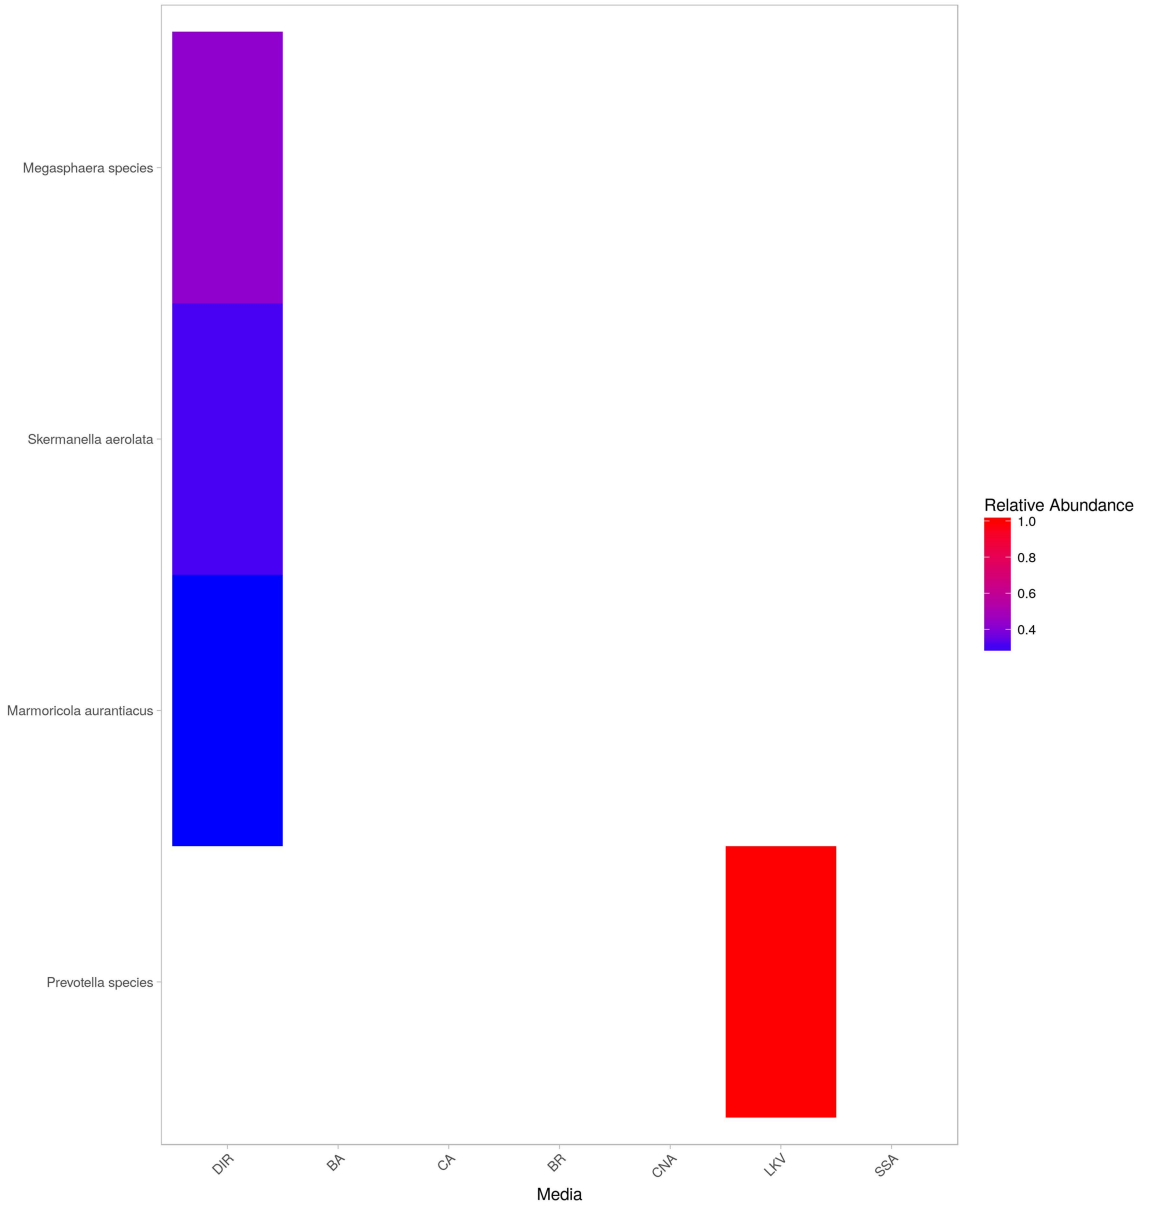

# BAL13

Relative Abundance by Classification Group

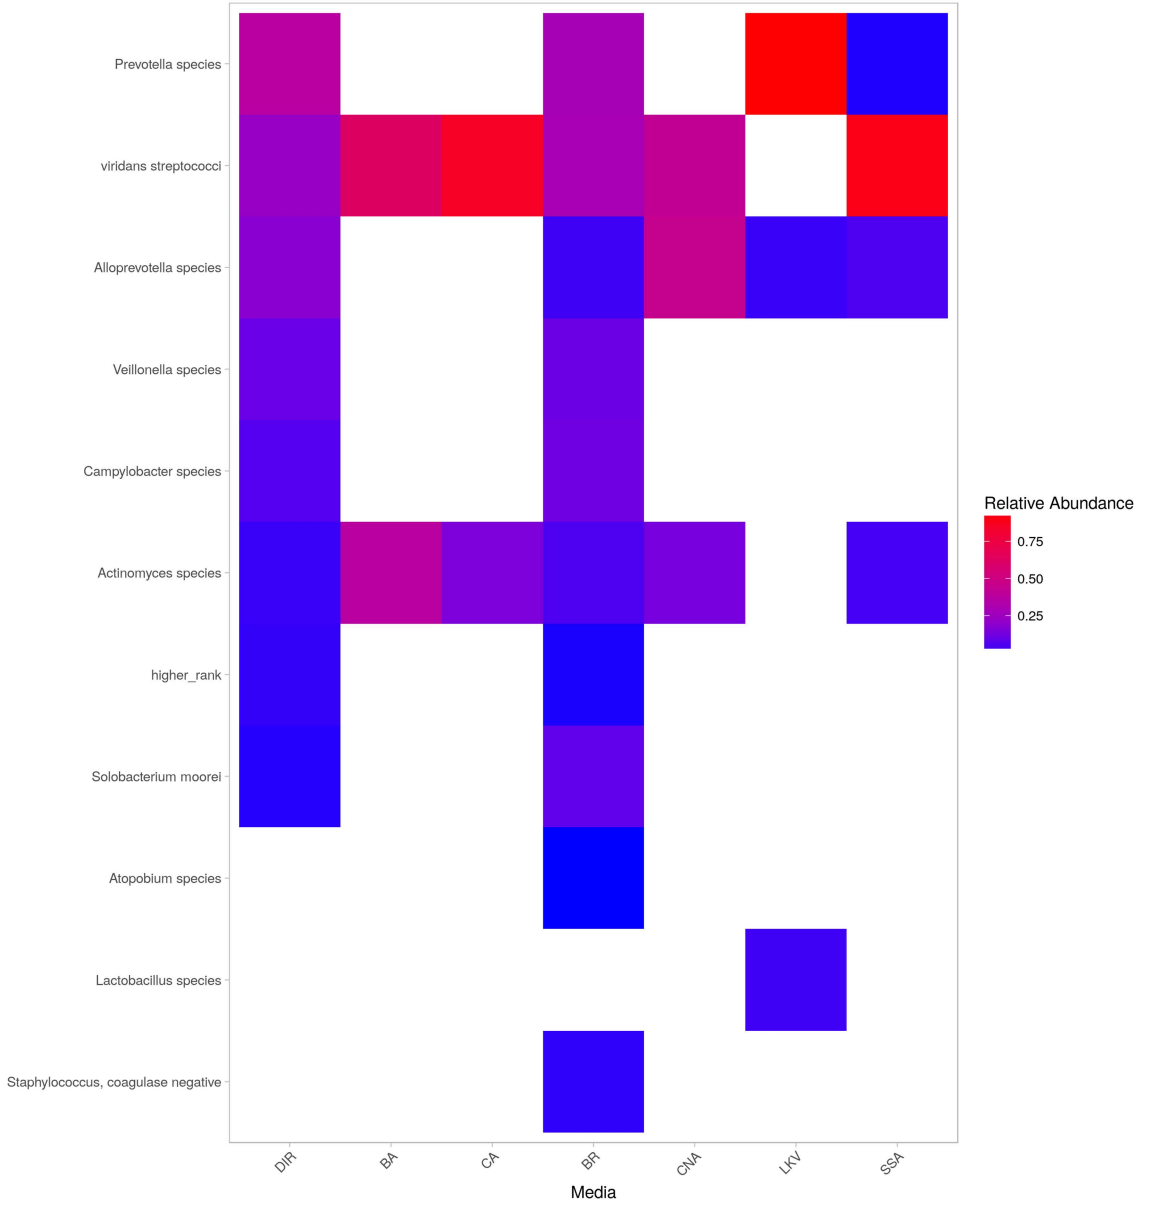

# BAL14

Relative Abundance by Classification Group

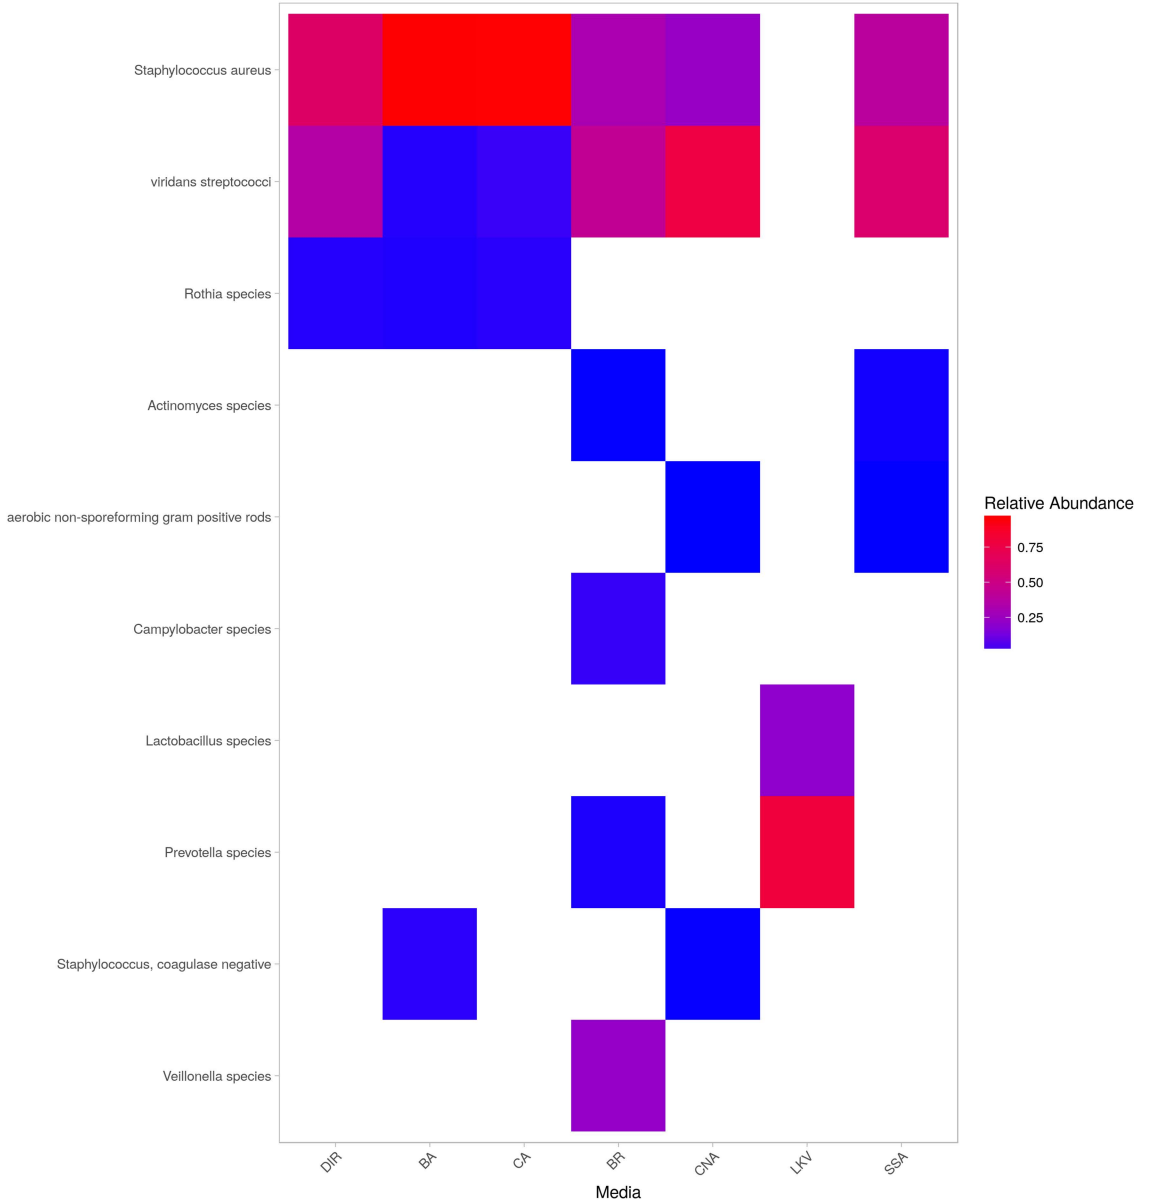

# BAL15

Relative Abundance by Classification Group

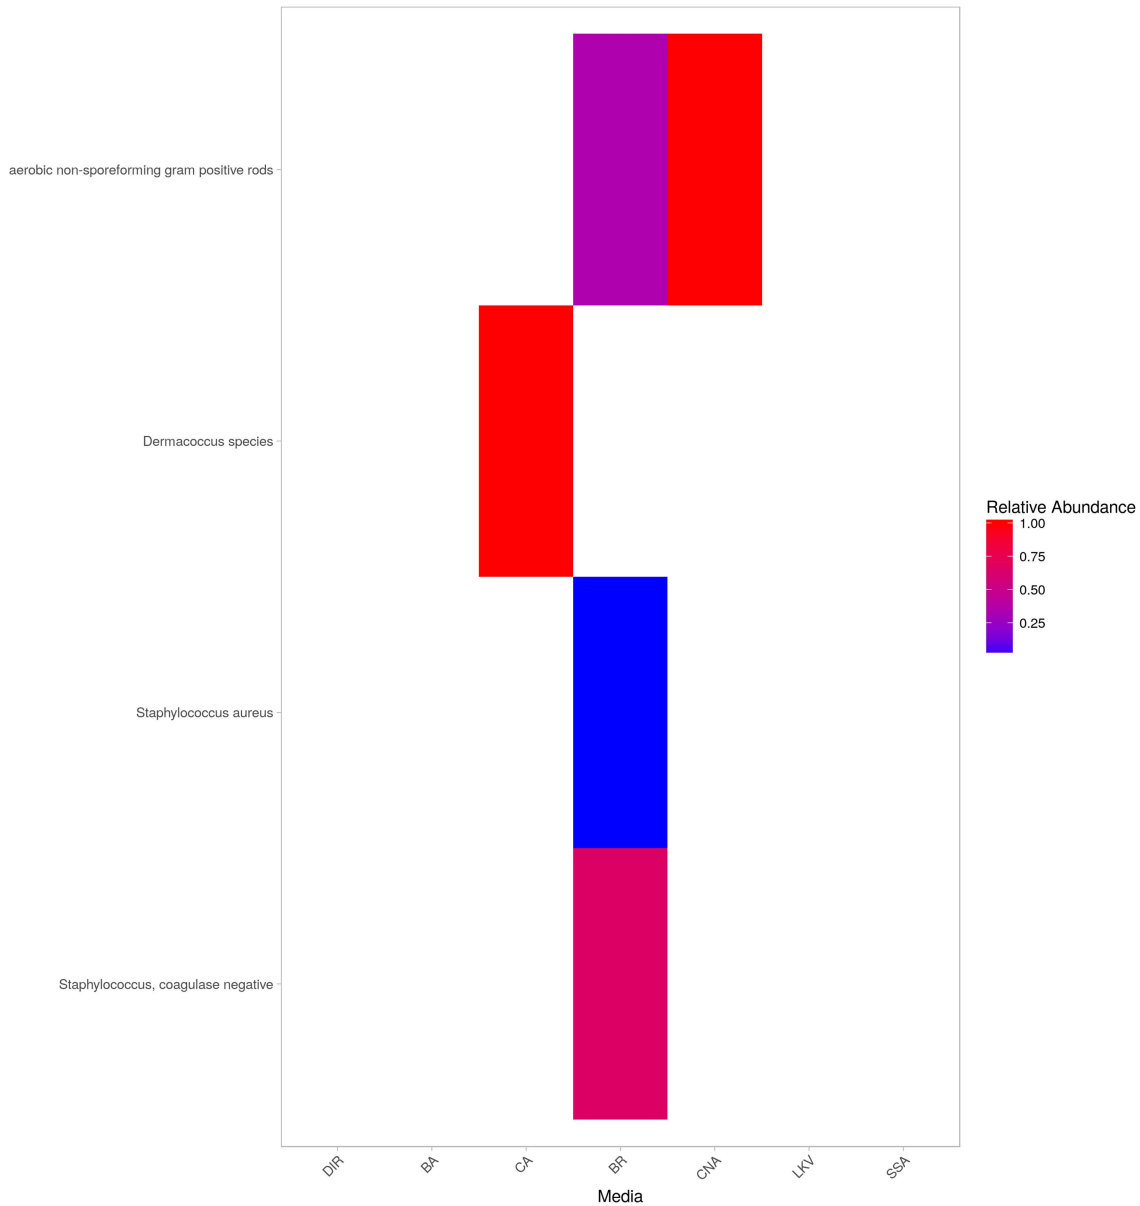





# BAL17

Relative Abundance by Classification Group

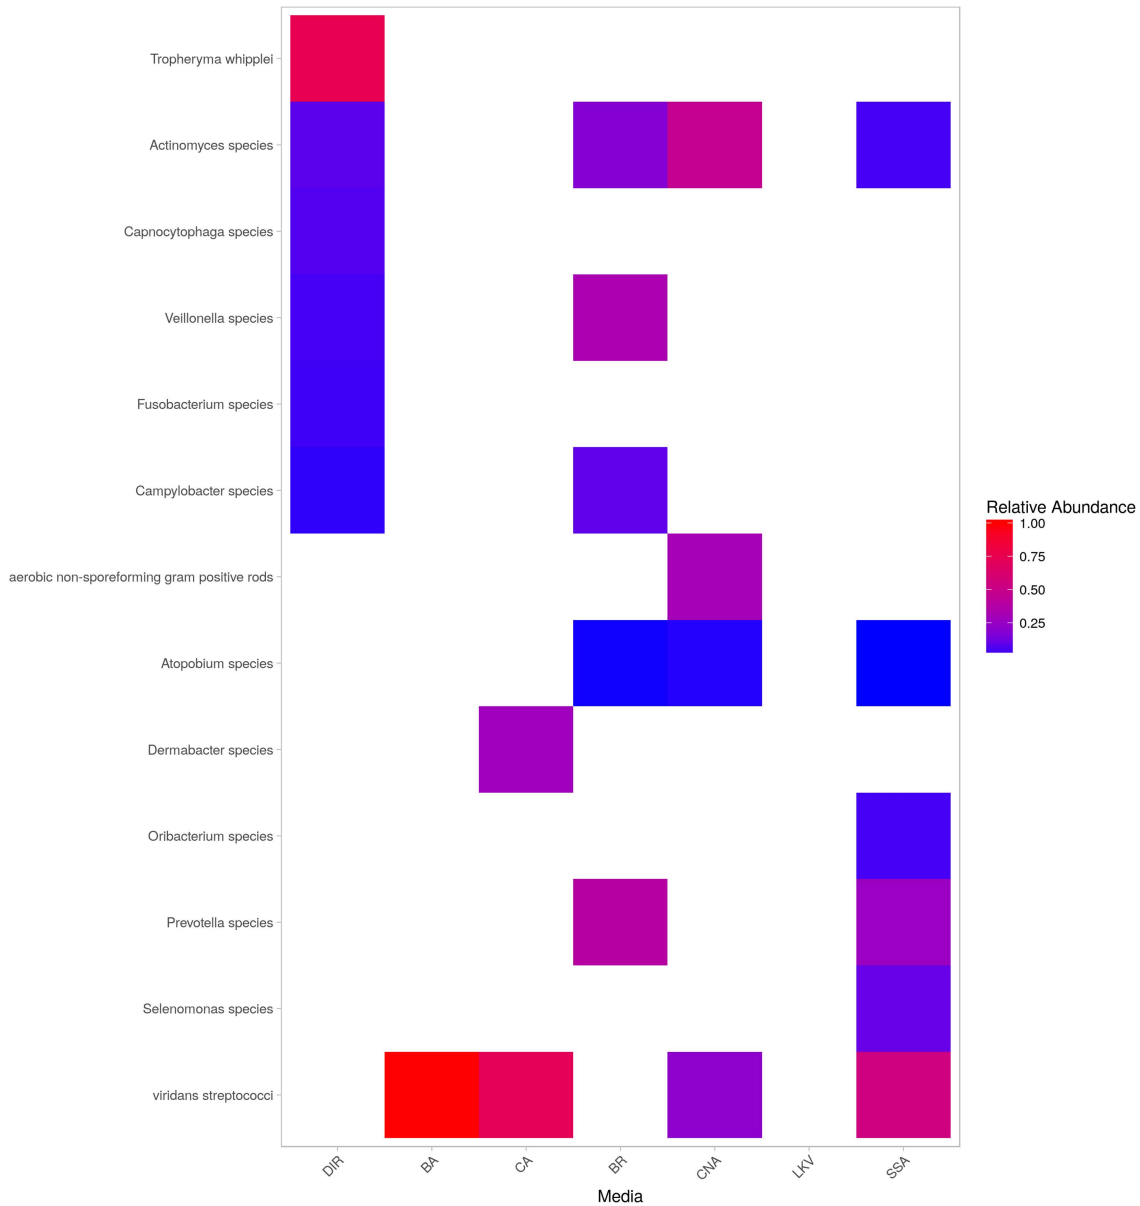

# BAL19

Relative Abundance by Classification Group

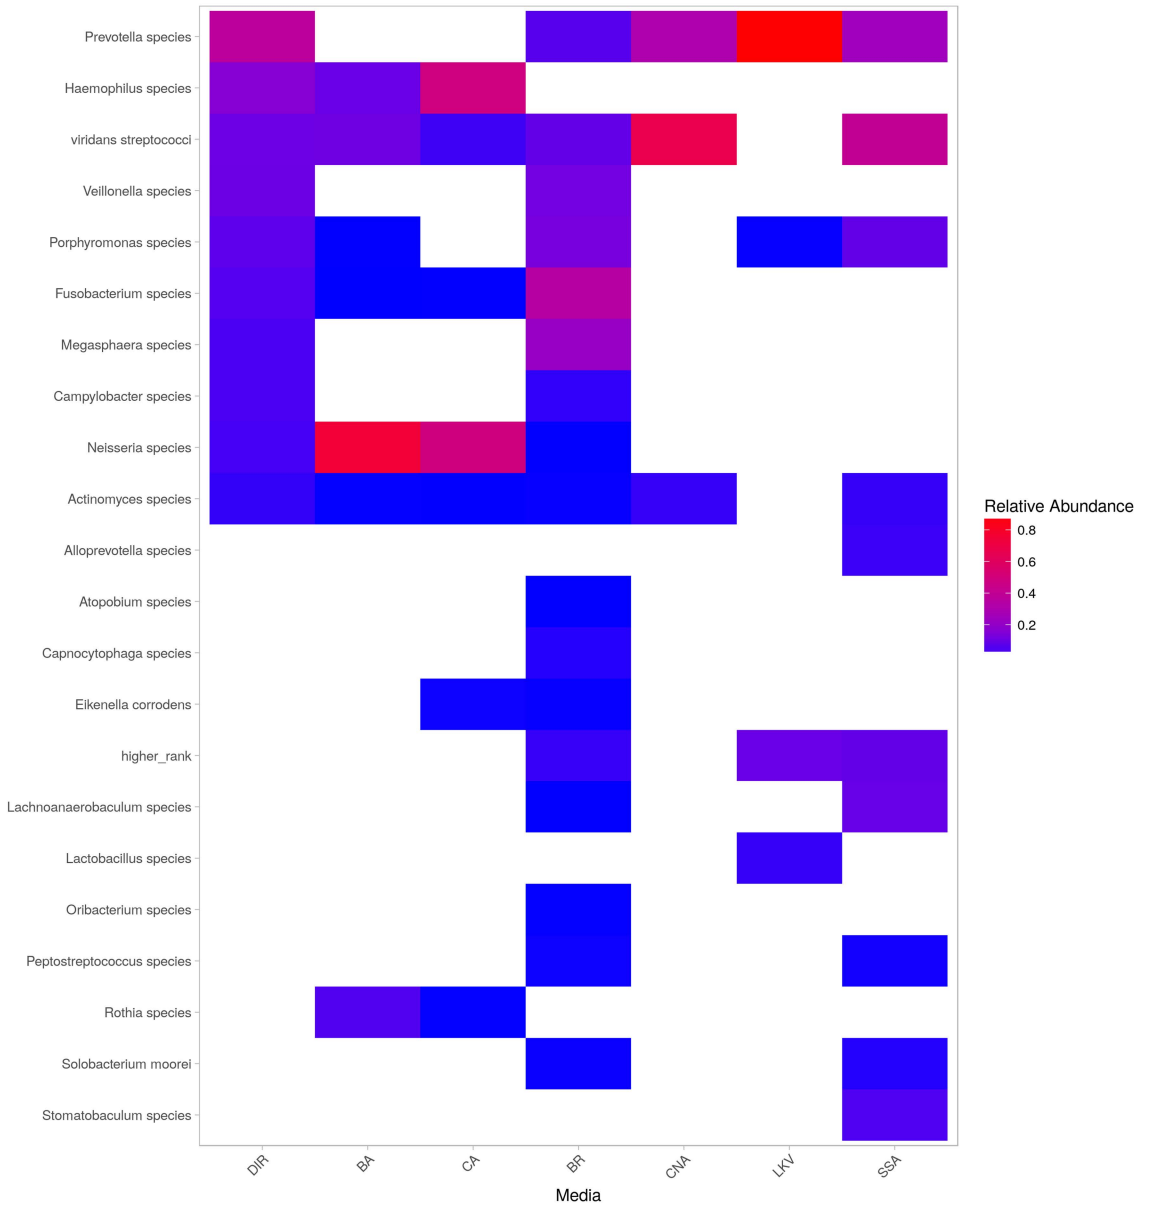

# BAL20

Relative Abundance by Classification Group

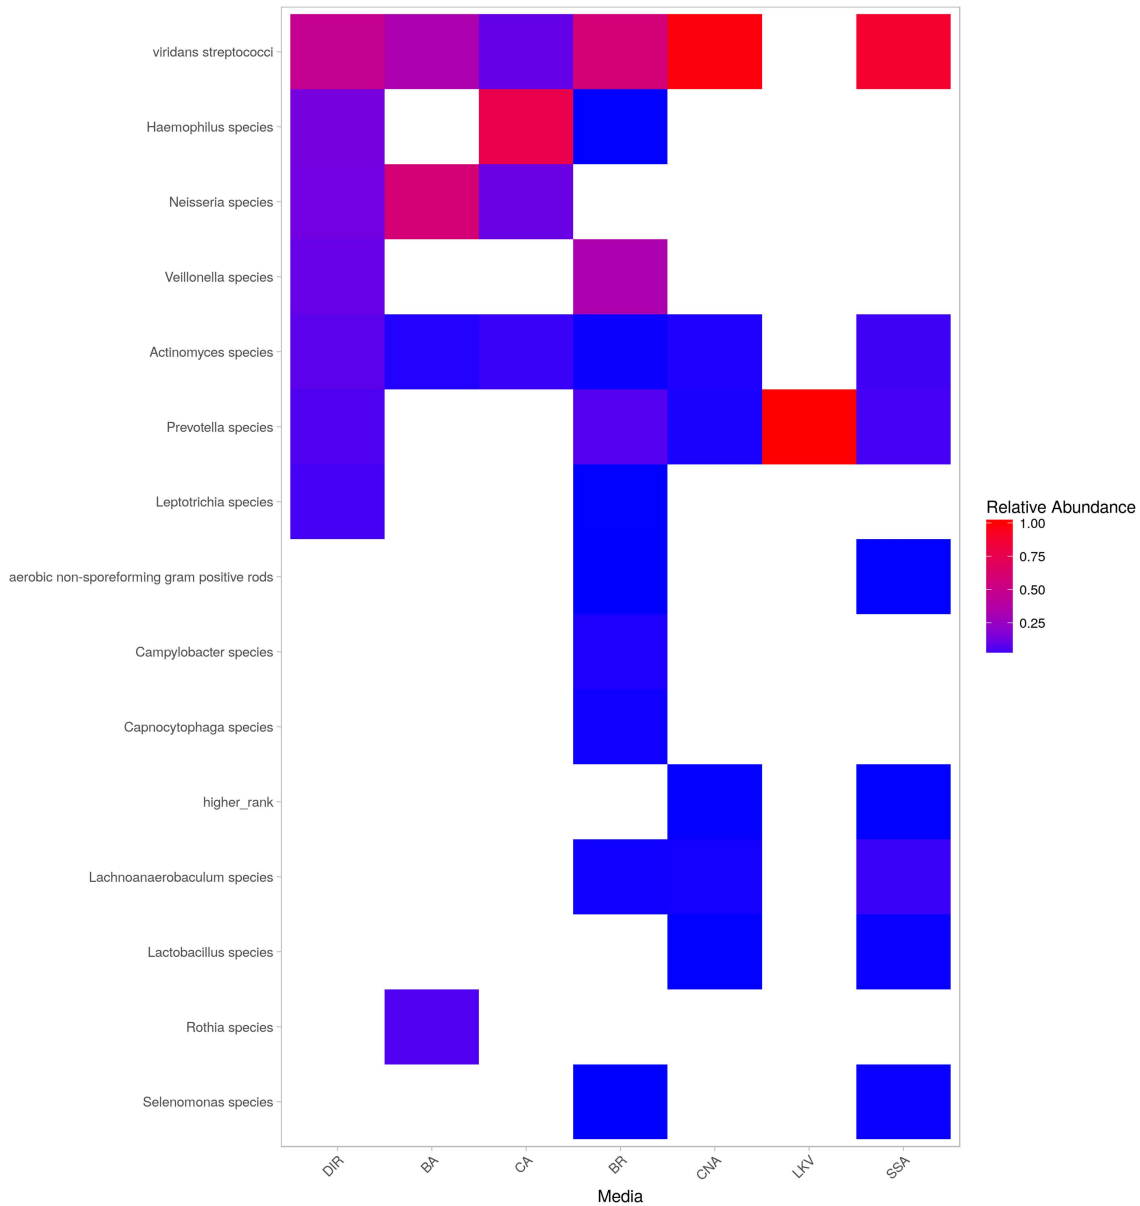

Supplement: 41598_2020_62424_MOESM2_ESM.pdf [file 41598_2020_62424_MOESM2_ESM.pdf]
